# Supplementary material for: N-Acetylcysteine Attenuates Sepsis-Induced Muscle Atrophy by Downregulating Endoplasmic Reticulum Stress
Source: MDPI journal article supplement (doi:10.3390/biomedicines12040902), 2024-04-18
Supplement: s1 [file s1]

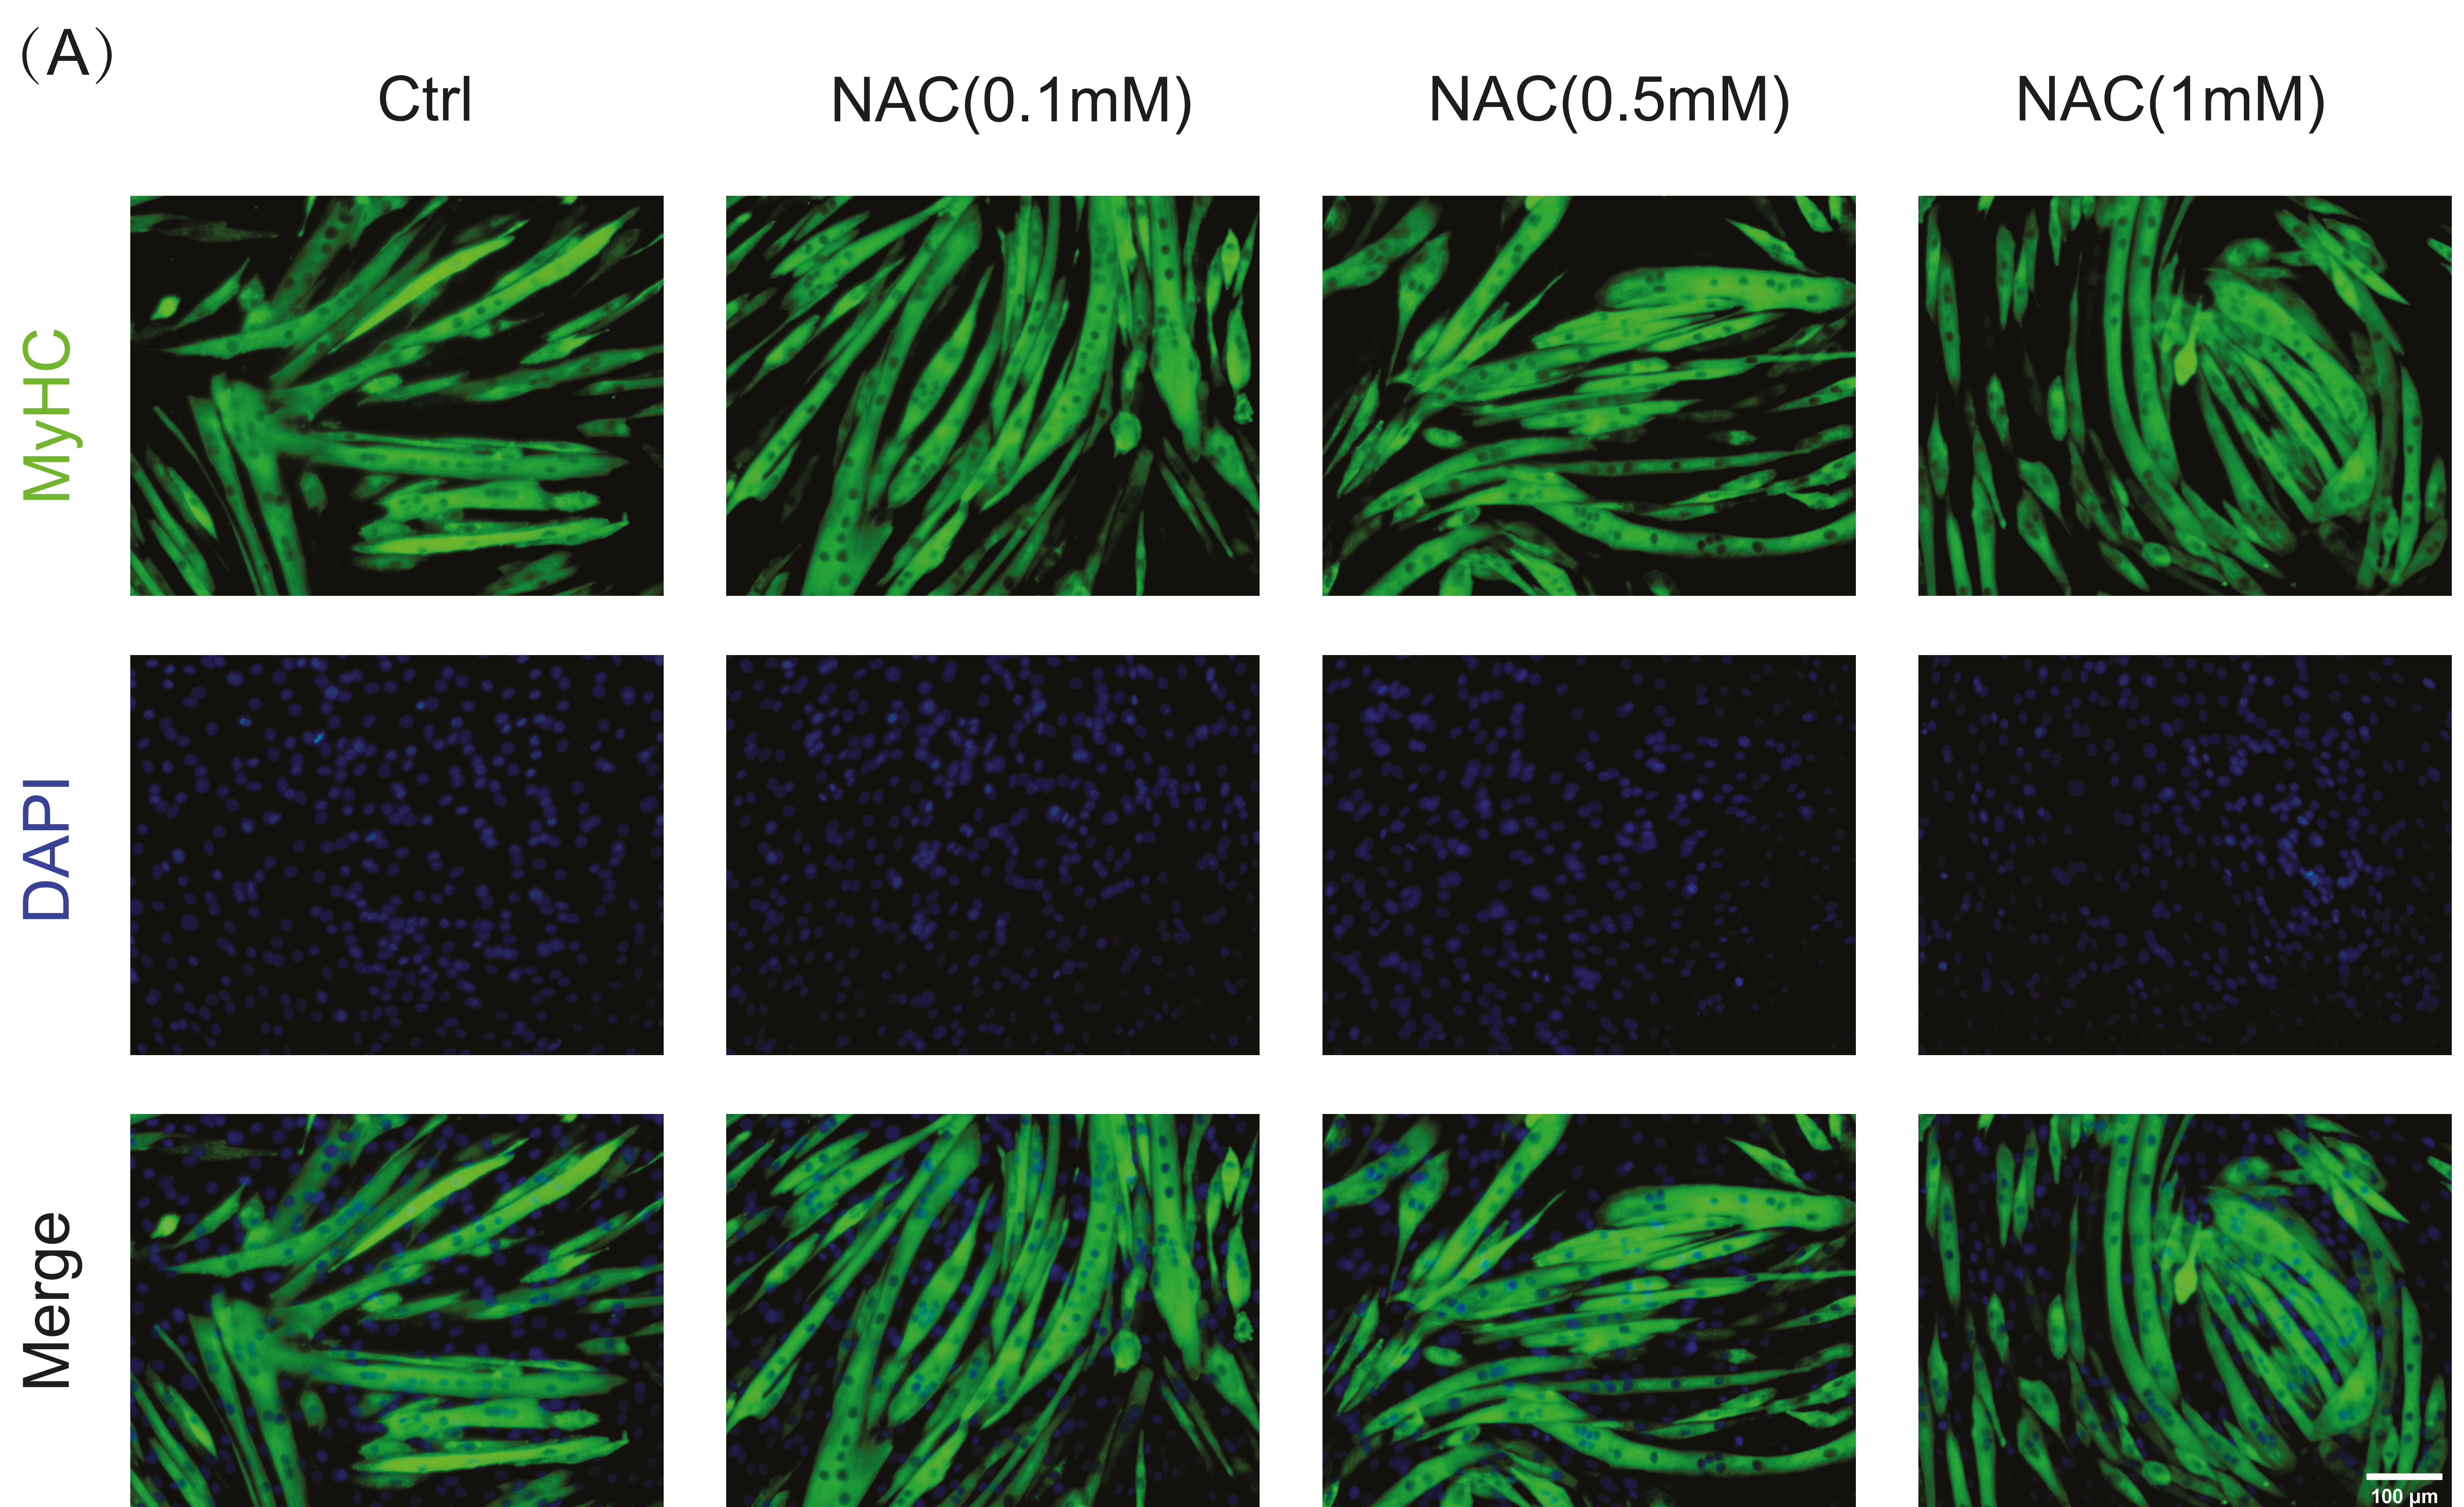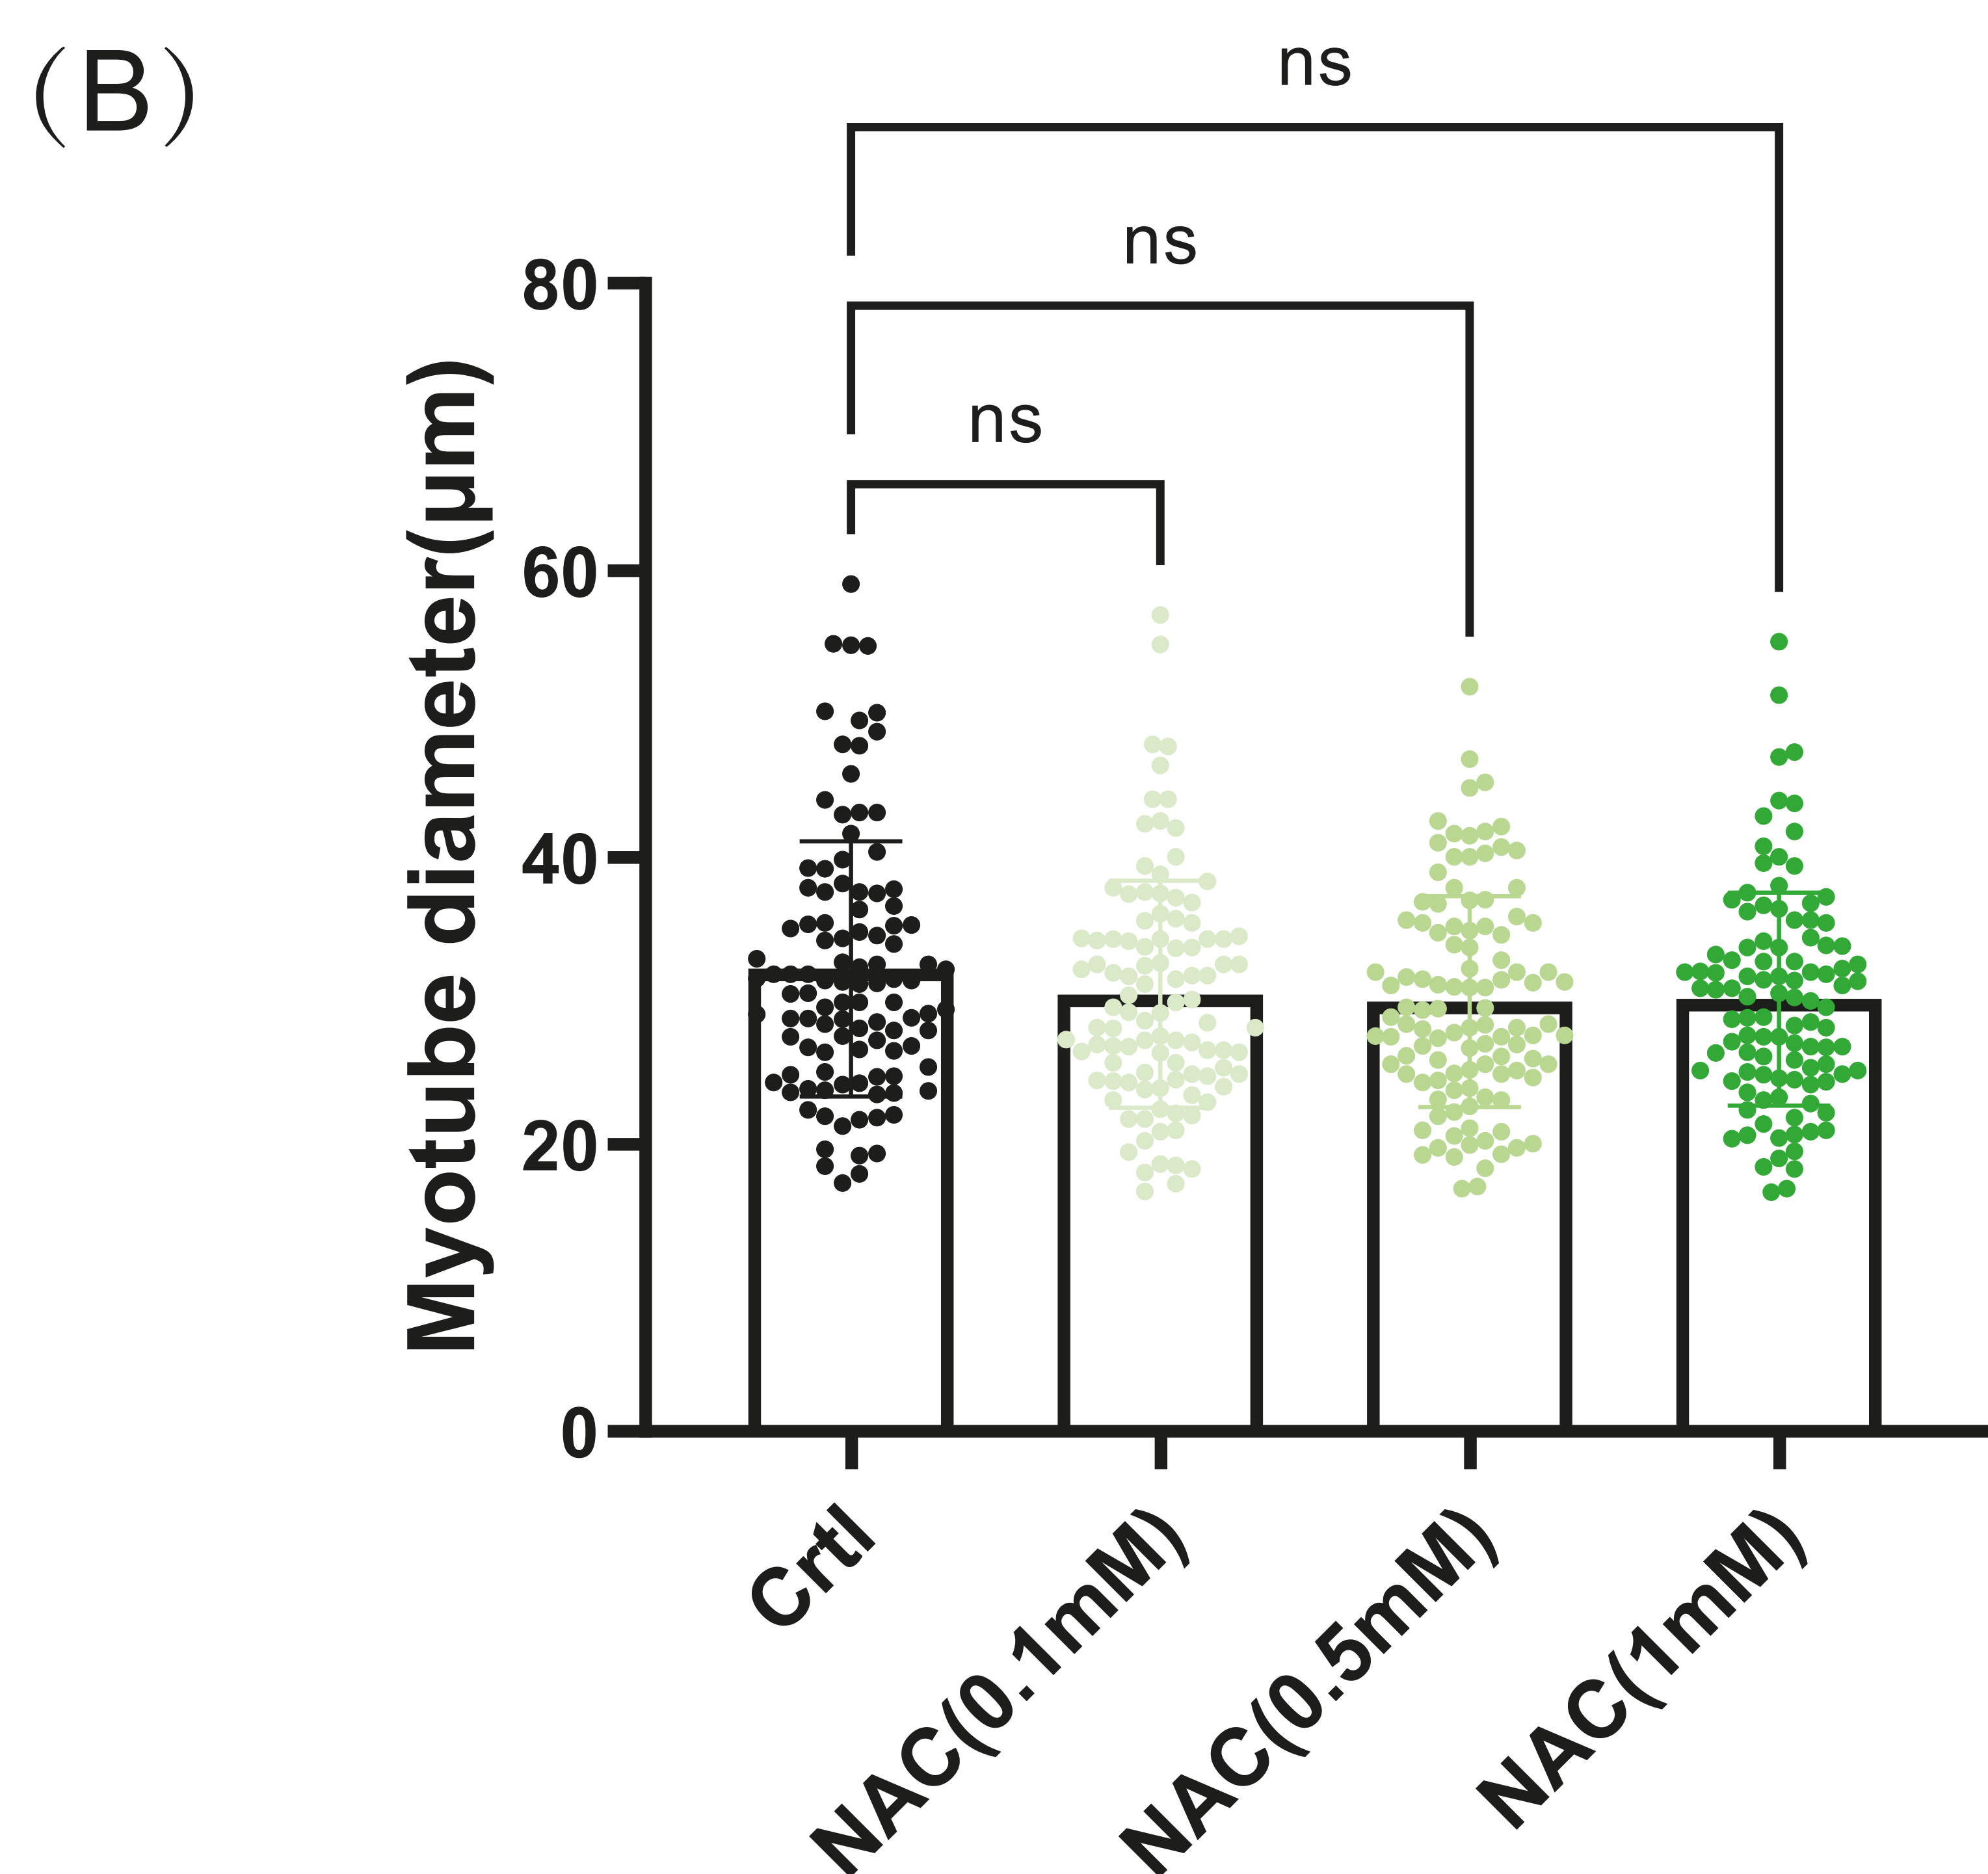

**Supplemental Figure S1.** Effect of NAC on myotube diameter. (A) Representative immunofluorescent images of myotubes treated with different concentrations of NAC. (B) Measurement of myotube diameter after administration of NAC. Scale bar = 100  $\mu\text{m}$ .
